# Supplementary material for: Highly efficient and chemoselective transfer hydrogenation of nitroarenes at room temperature over magnetically separable Fe–Ni bimetallic nanoparticles
Source: Royal Society of Chemistry journal article supplement (doi:10.1039/c3ra45787g), 2013-11-26
Supplement: c3ra45787g.pdf [file c3ra45787g.pdf]

**Highly efficient and chemoselective transfer hydrogenation of nitroarenes  
at room temperature over magnetically separable Fe-Ni bimetallic  
nanoparticles**

**Dhananjay R. Petkar, Brijesh S. Kadu, Rajeev C. Chikate\***

Nanoscience Group, Department of Chemistry, Post-graduate and Research Centre, MES  
Abasaheb Garware College, Karve Road, Pune 411004, India

\* Corresponding author phone: 91-20-41038263; fax: 91-20-25438165; email:

rajuchikate29@gmail.com

**Total number of pages: 16**

**Total number of figures: 3 (Figure S1 – S3)**

**Total number of tables: 1 (Table T1)**

**Figure S1:** TEM image of Fe-Ni NP's.

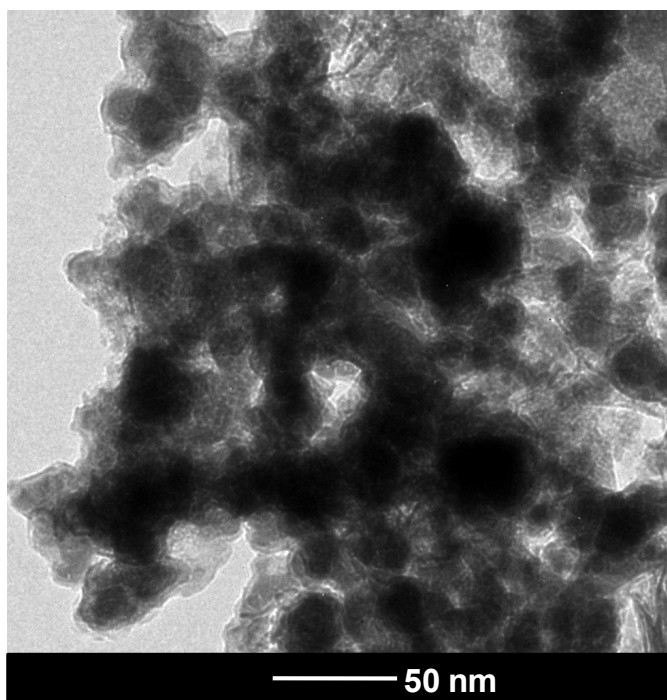

**Figure S2:** Effect of Fe-Ni NP's loading on reduction of nitrobenzene.

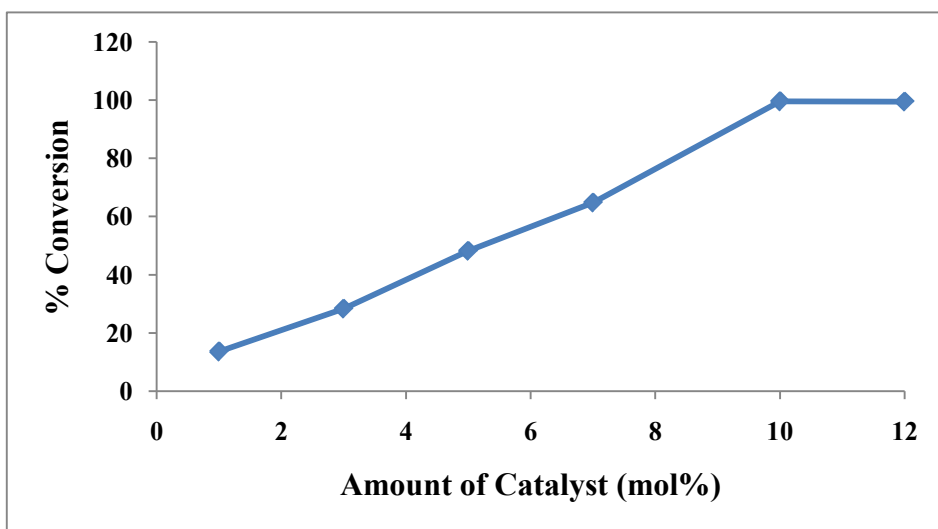

**Figure S3:** GC-MS of CTH reactions carried out with Fe-Ni NP's with NaBH<sub>4</sub> at ambient conditions.

GC of standard nitrobenzene

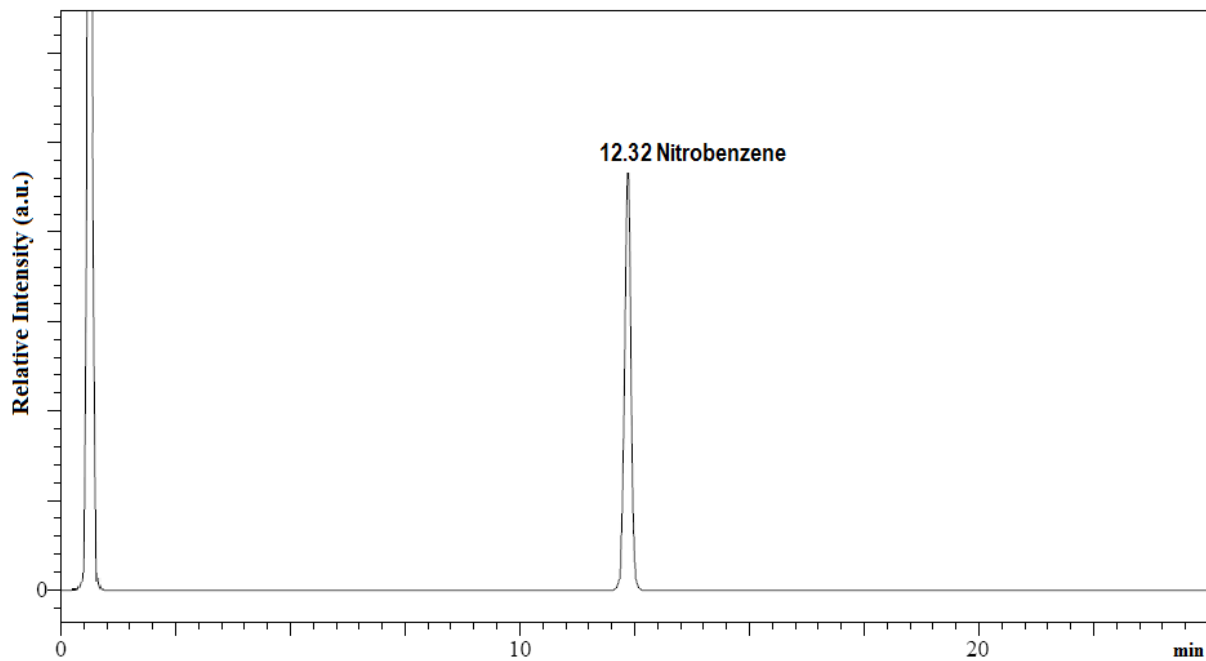

GC of standard aniline

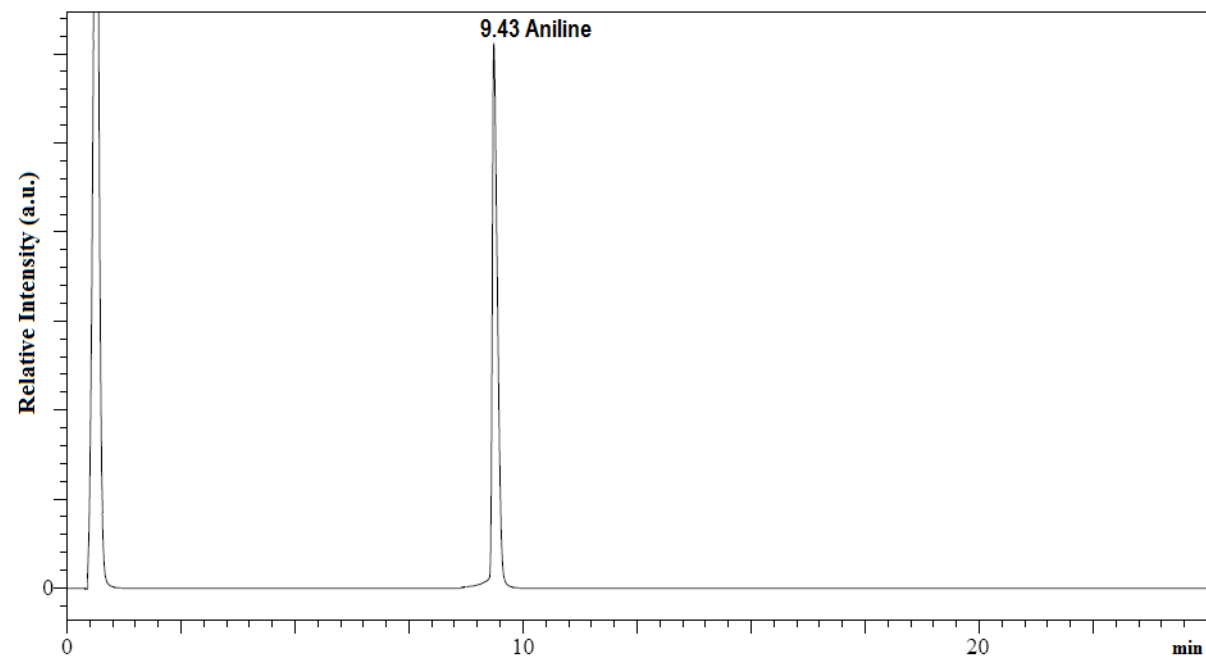

### 1. Nitrobenzene to aniline (reaction carried out in methanol)

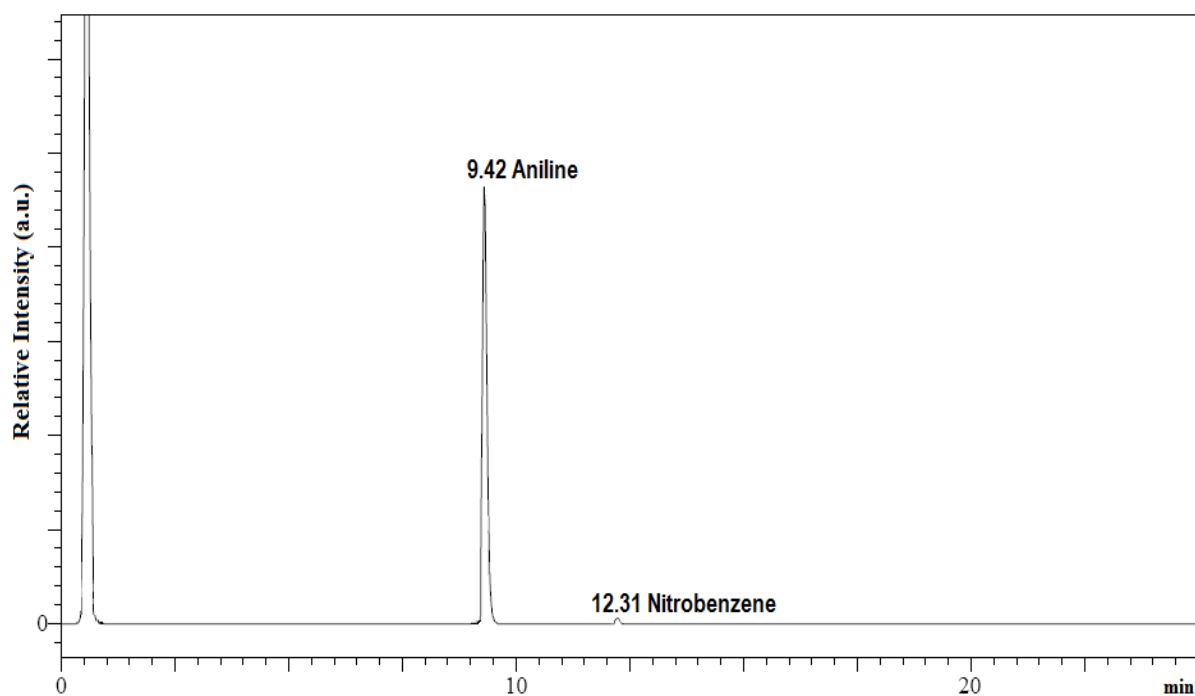

Peak Table – Channel 1

| Peak# | Ret. Time | Name         | Area     | Area%  |
|-------|-----------|--------------|----------|--------|
| 1     | 9.42      | Aniline      | 36080262 | 99.52  |
| 2     | 12.31     | Nitrobenzene | 174020   | 0.48   |
| Total |           |              |          | 100.00 |

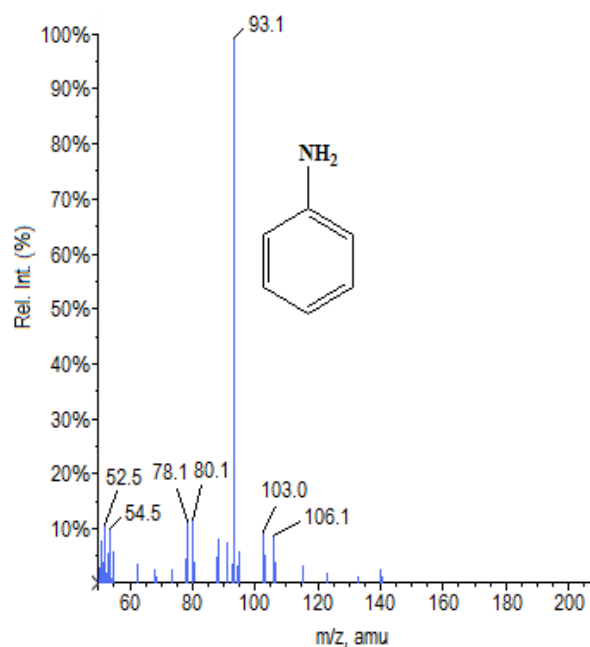

Nitrobenzene to aniline (reaction carried out in water)

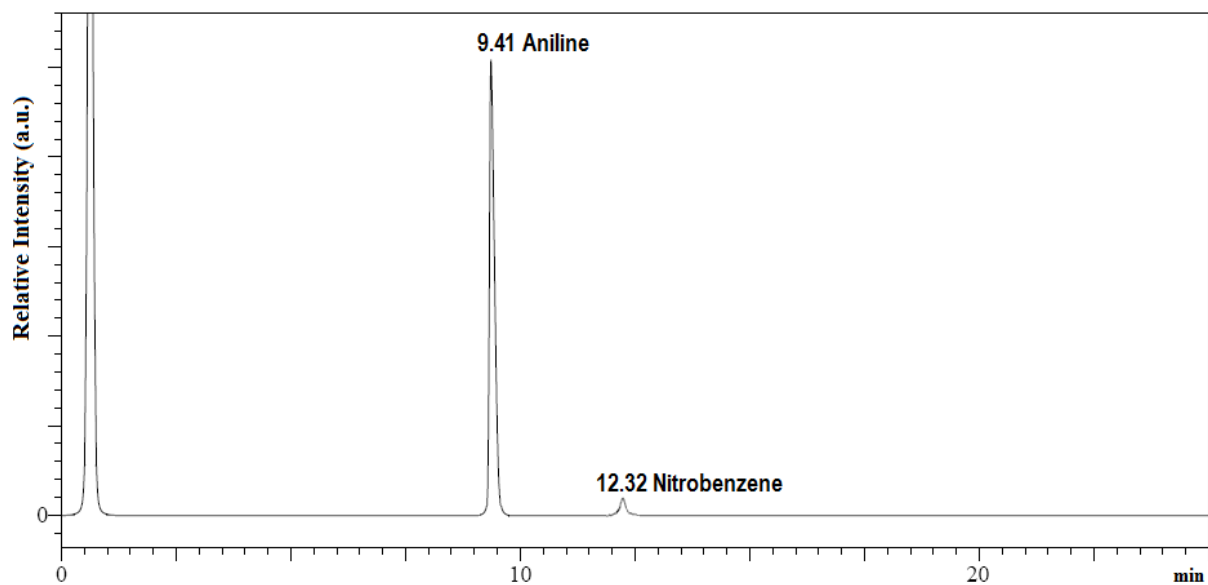

Peak Table – Channel 1

| Peak# | Ret. Time | Name         | Area     | Area%  |
|-------|-----------|--------------|----------|--------|
| 1     | 9.41      | Aniline      | 33845586 | 98.71  |
| 2     | 12.32     | Nitrobenzene | 442314   | 1.29   |
| Total |           |              |          | 100.00 |

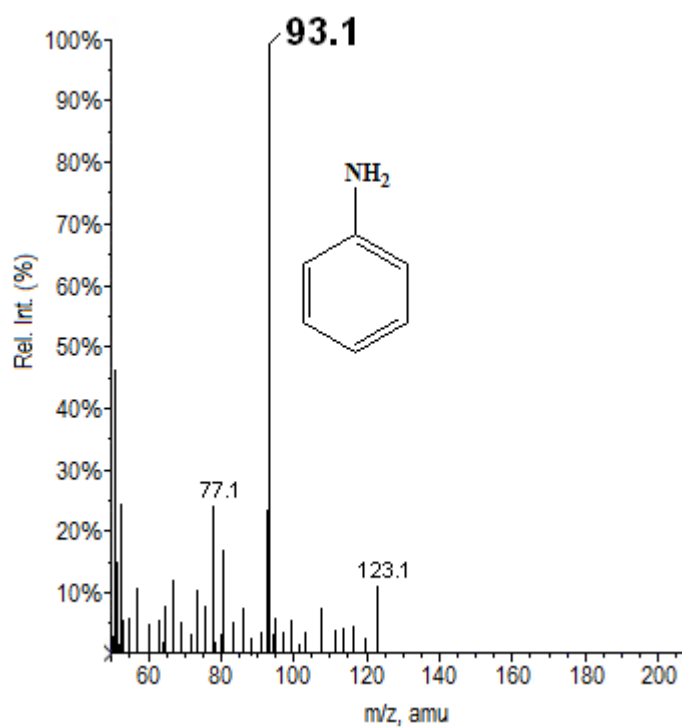

## 2. o-nitrotoluene to o-toluidine

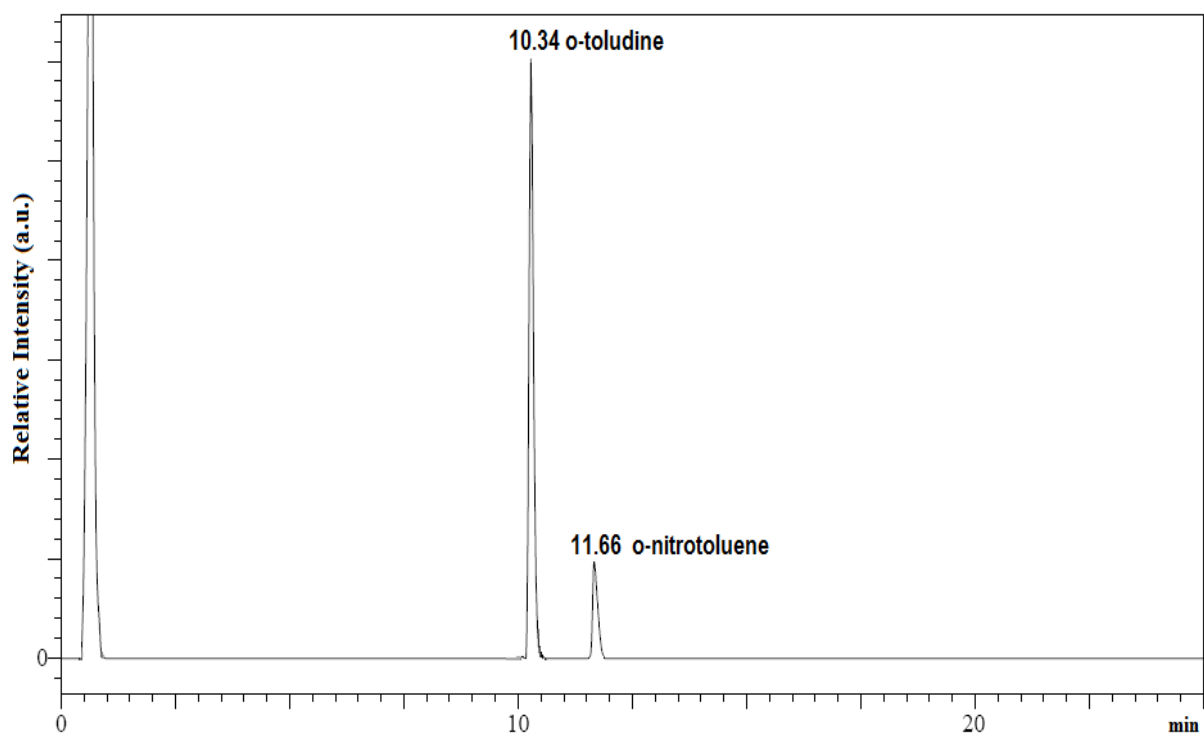

Peak Table – Channel 1

| Peak# | Ret. Time | Name           | Area    | Area%  |
|-------|-----------|----------------|---------|--------|
| 1     | 10.34     | o-toluidine    | 5844624 | 88.02  |
| 2     | 11.66     | o-nitrotoluene | 795485  | 11.98  |
| Total |           |                |         | 100.00 |

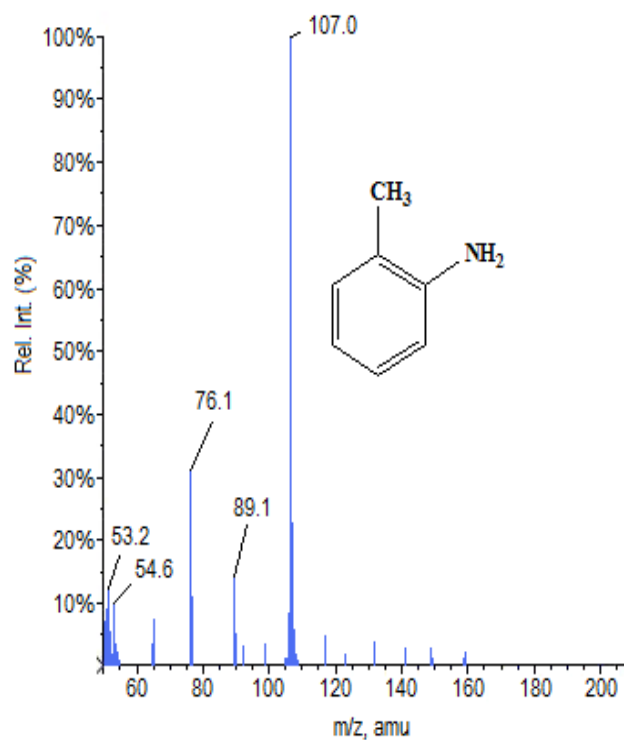

### 3. p-nitrotoluene to p-toluidine

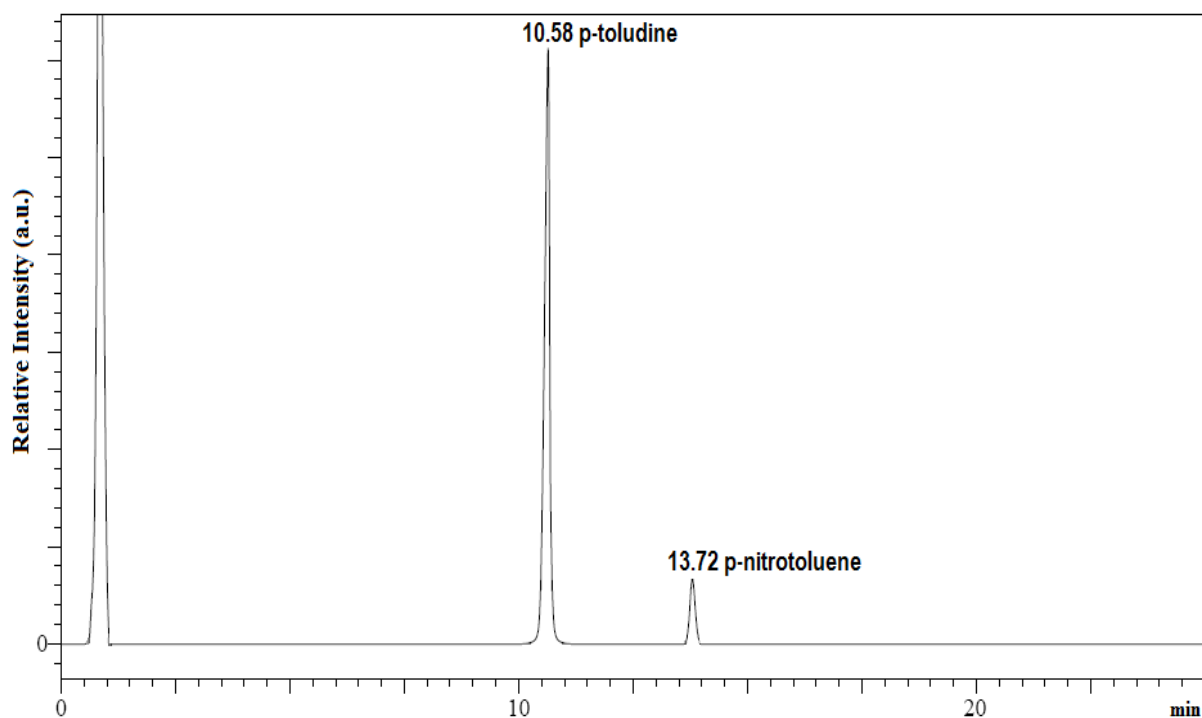

Peak Table – Channel 1

| Peak# | Ret. Time | Name           | Area     | Area%  |
|-------|-----------|----------------|----------|--------|
| 1     | 10.58     | p-toluidine    | 29170212 | 90.17  |
| 2     | 13.72     | p-nitrotoluene | 3180029  | 9.83   |
| Total |           |                |          | 100.00 |

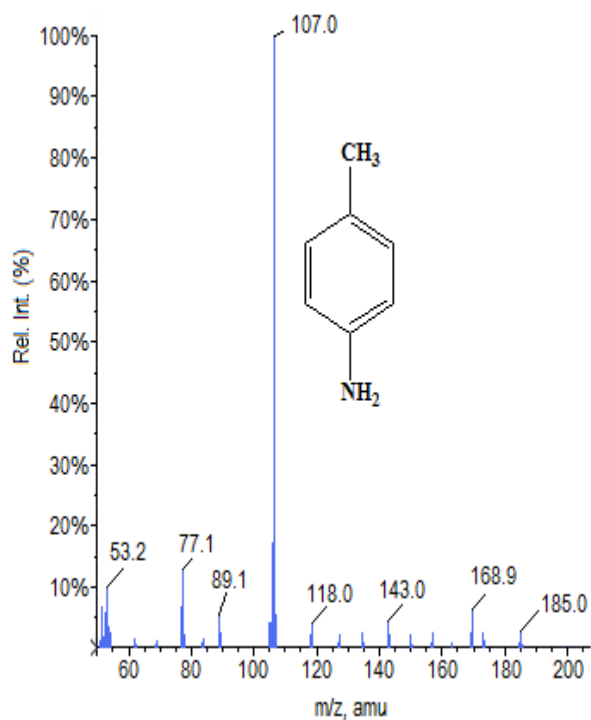



#### 4. p-nitrobenzoic acid to p-aminobenzoic acid

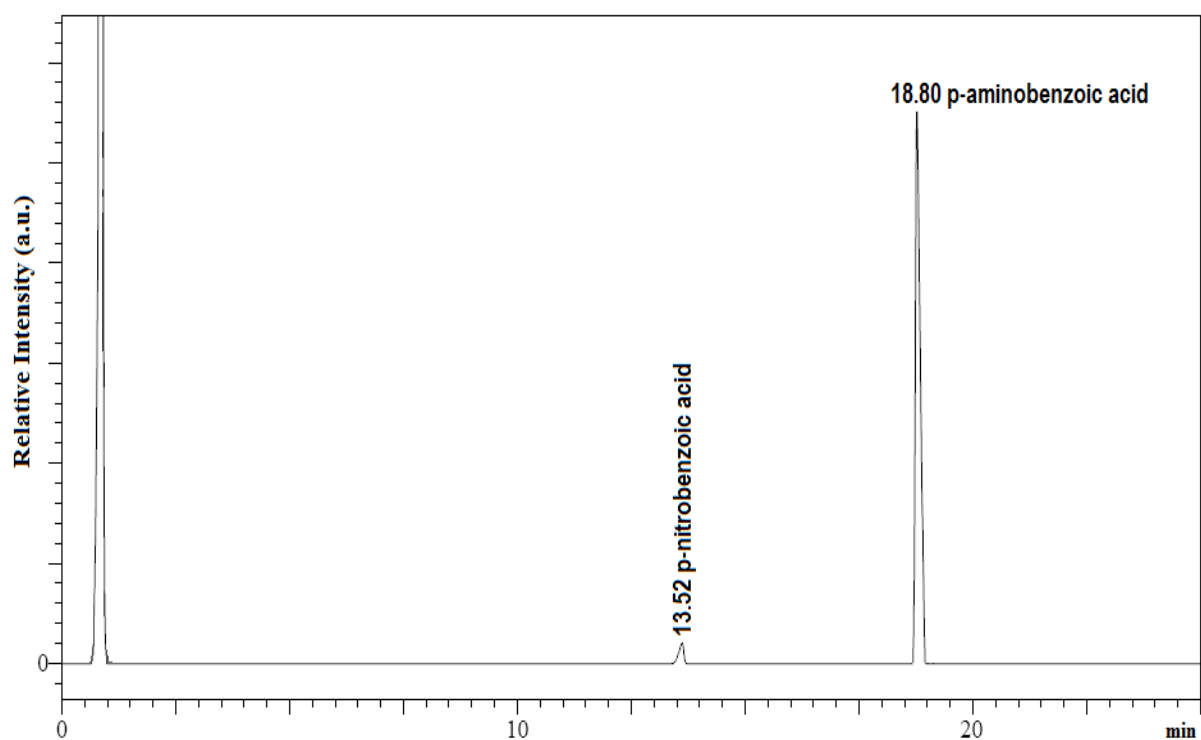

Peak Table – Channel 1

| Peak# | Ret. Time | Name                | Area     | Area%  |
|-------|-----------|---------------------|----------|--------|
| 1     | 13.52     | p-nitrobenzoic acid | 1290459  | 4.43   |
| 2     | 18.80     | p-aminobenzoic acid | 27839547 | 95.57  |
| Total |           |                     |          | 100.00 |

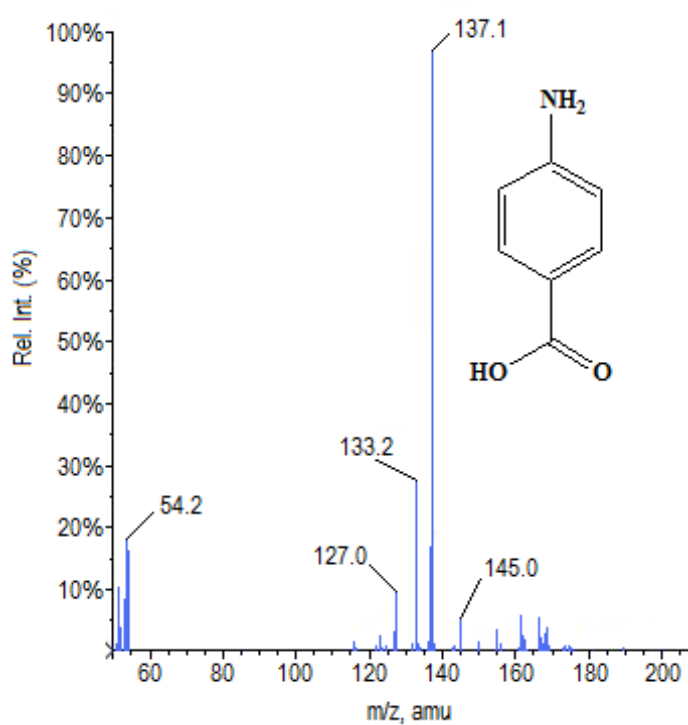

### 5. p-nitrophenol to p-aminophenol

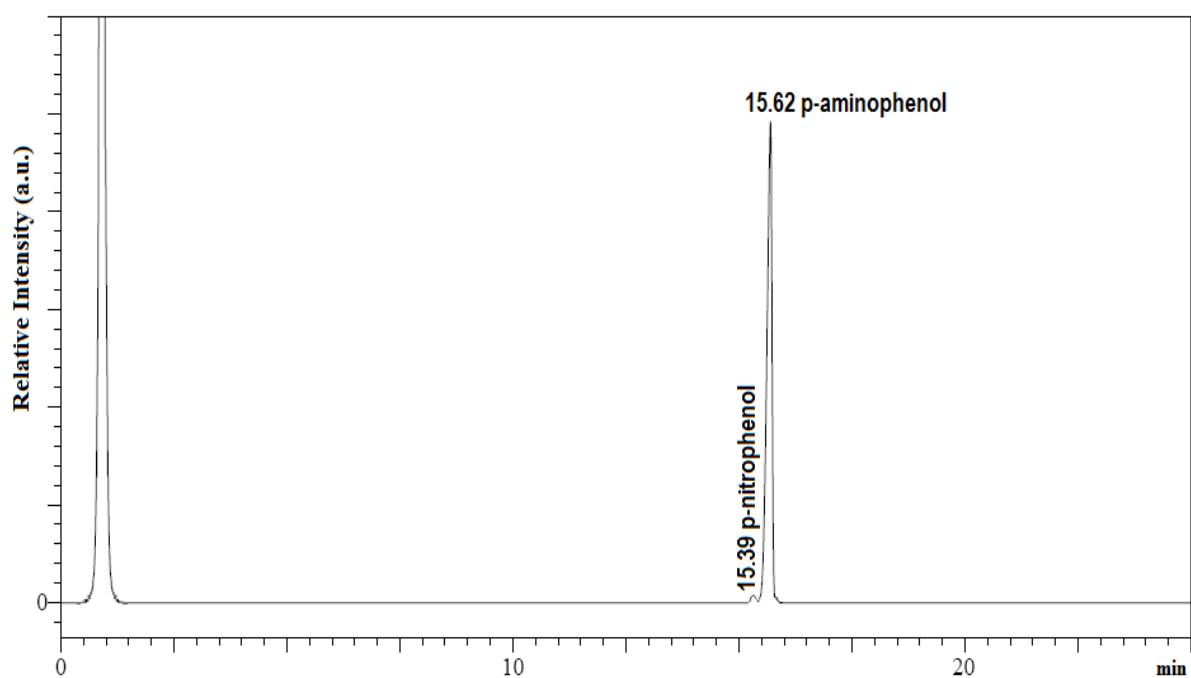

Peak Table – Channel 1

| Peak# | Ret. Time | Name          | Area    | Area%  |
|-------|-----------|---------------|---------|--------|
| 1     | 15.39     | p-nitrophenol | 42100   | 0.63   |
| 2     | 15.62     | p-aminophenol | 6640427 | 99.37  |
| Total |           |               |         | 100.00 |

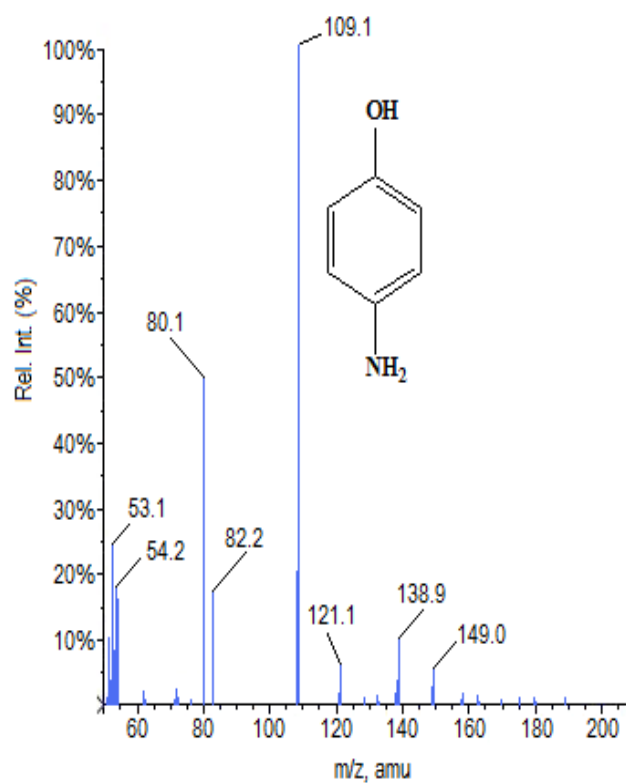

## 6. m-dinitrobenzene to m-nitroaniline

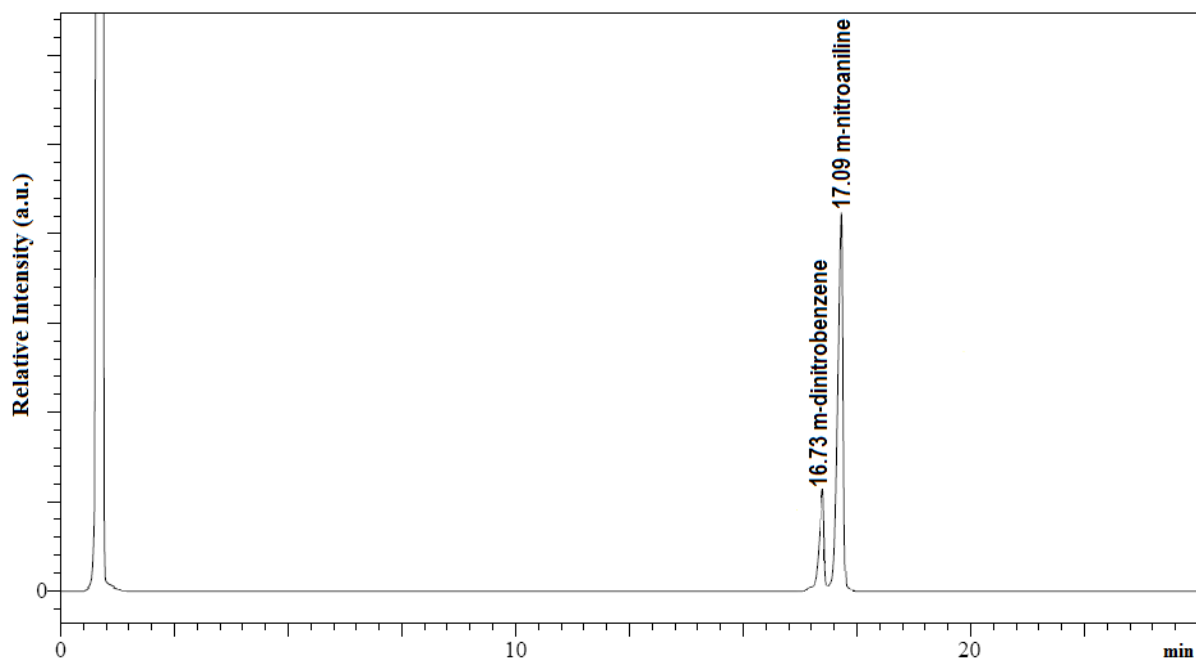

Peak Table – Channel 1

| Peak# | Ret. Time | Name             | Area    | Area%  |
|-------|-----------|------------------|---------|--------|
| 1     | 16.73     | m-dinitrobenzene | 896699  | 19.74  |
| 2     | 17.09     | m-nitroaniline   | 3645850 | 80.26  |
| Total |           |                  |         | 100.00 |

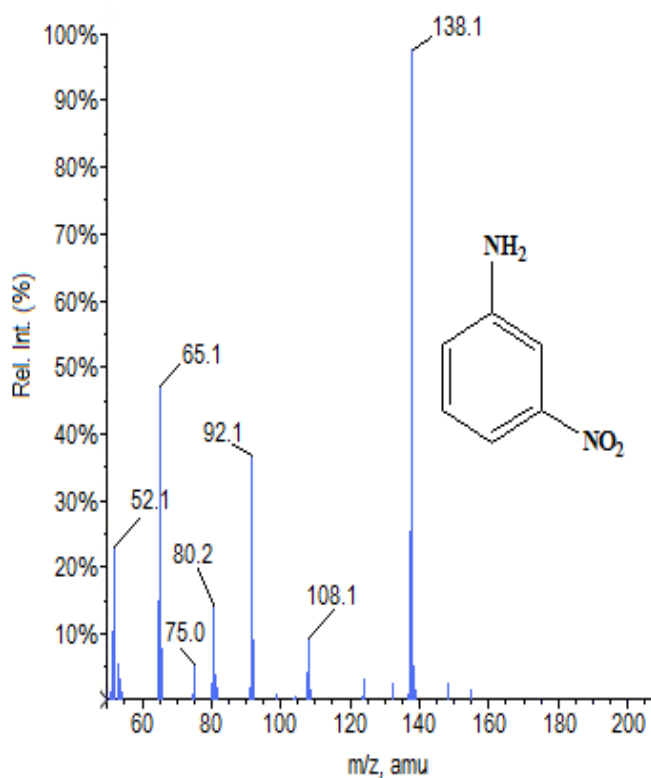

7. 1-(chloromethyl)-4-nitrobenzene to 4-(chloromethyl) aniline

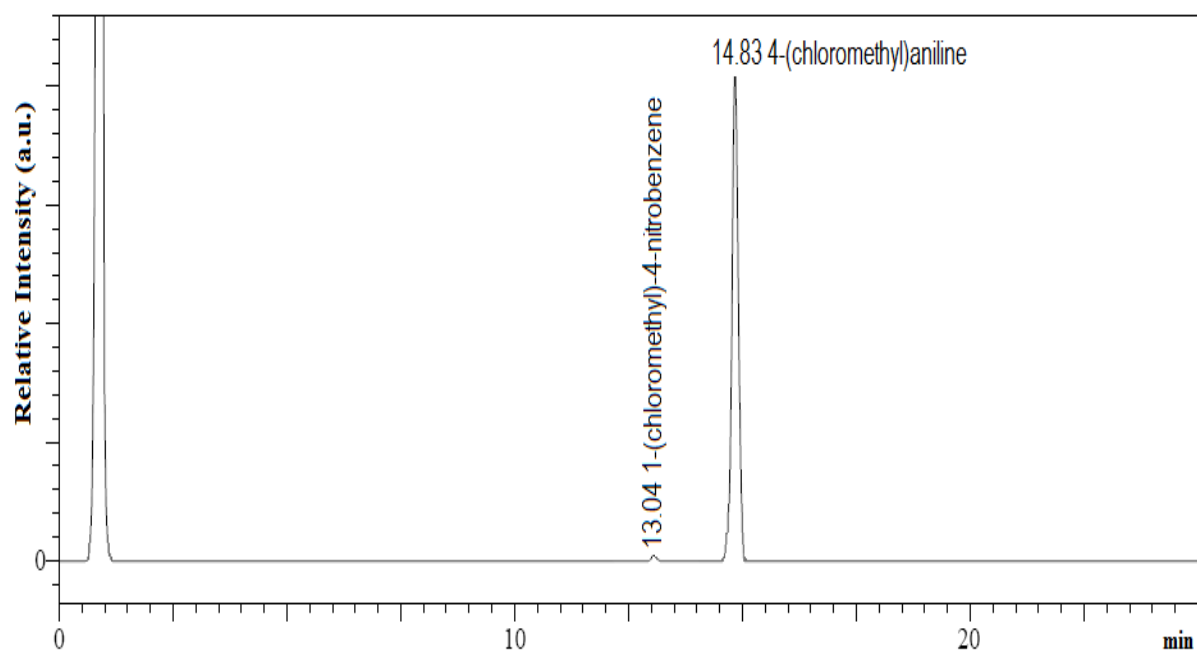

Peak Table – Channel 1

| Peak# | Ret. Time | Name                            | Area    | Area%  |
|-------|-----------|---------------------------------|---------|--------|
| 1     | 13.04     | 1-(chloromethyl)-4-nitrobenzene | 11198   | 0.21   |
| 2     | 14.83     | 4-(chloromethyl)aniline         | 5321130 | 99.79  |
| Total |           |                                 |         | 100.00 |

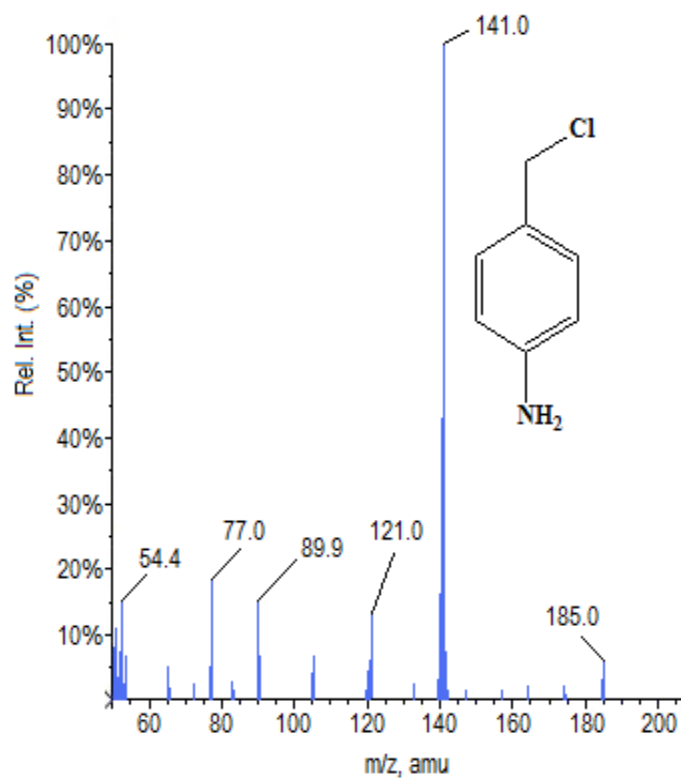

8. 1-(bromomethyl)-4-nitrobenzene to 4-(bromomethyl)aniline

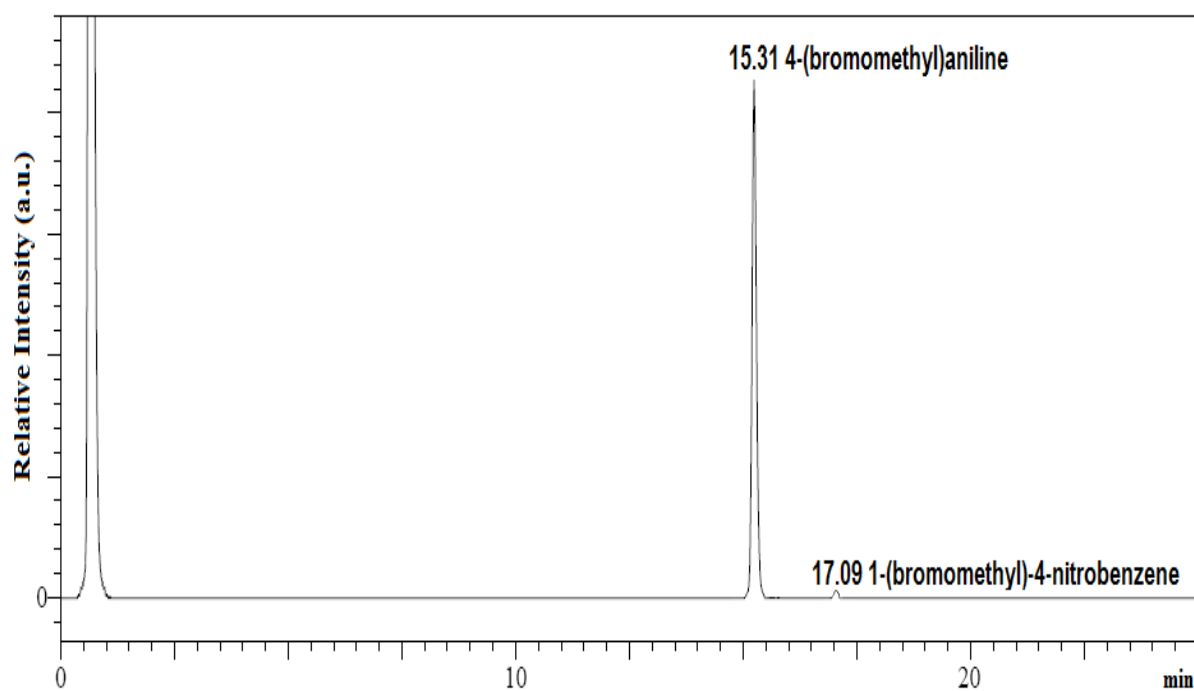

Peak Table – Channel 1

| Peak# | Ret. Time | Name                           | Area    | Area%  |
|-------|-----------|--------------------------------|---------|--------|
| 1     | 15.31     | 4-(bromomethyl)aniline         | 3455208 | 98.85  |
| 2     | 17.09     | 1-(bromomethyl)-4-nitrobenzene | 40197   | 1.15   |
| Total |           |                                |         | 100.00 |

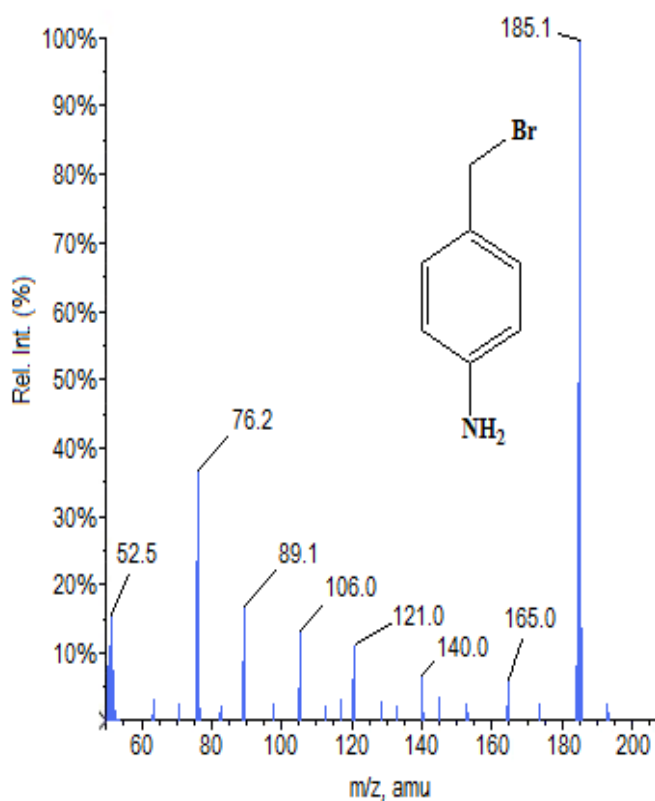

### 9. 4-nitrobenzonitrile to 4-aminobenzonitrile

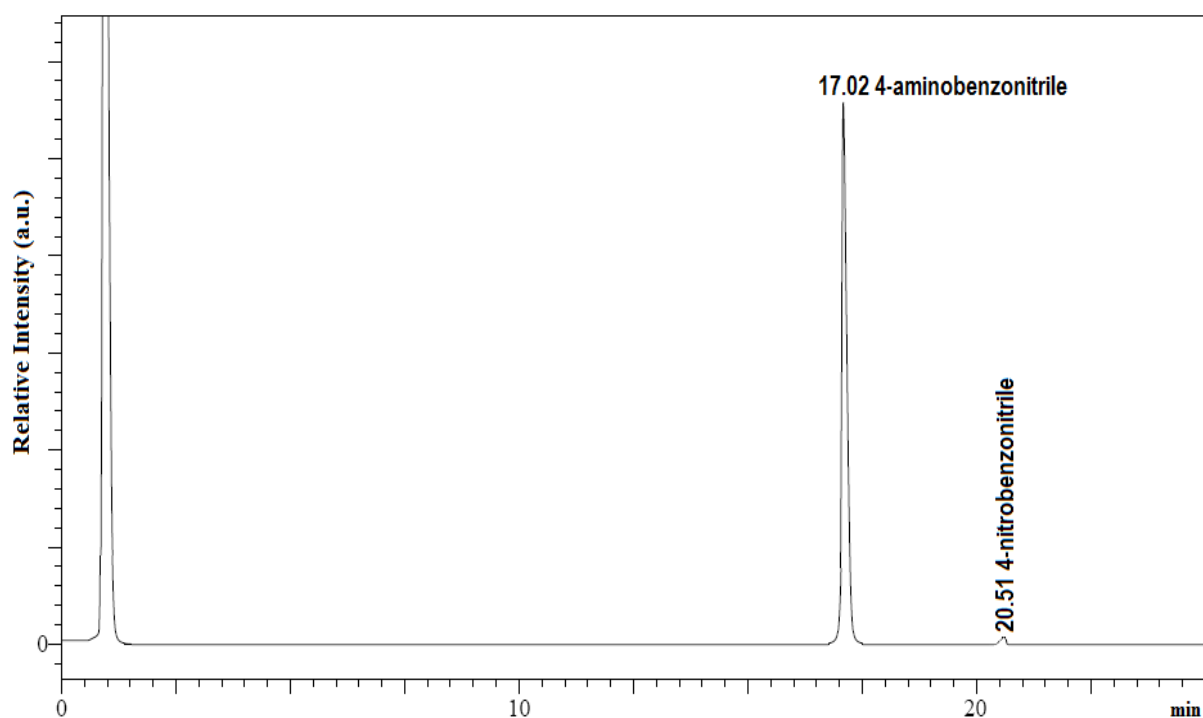

Peak Table – Channel 1

| Peak# | Ret. Time | Name                | Area    | Area%  |
|-------|-----------|---------------------|---------|--------|
| 1     | 17.02     | 4-aminobenzonitrile | 3389479 | 99.57  |
| 2     | 20.51     | 4-nitrobenzonitrile | 14638   | 0.43   |
| Total |           |                     |         | 100.00 |

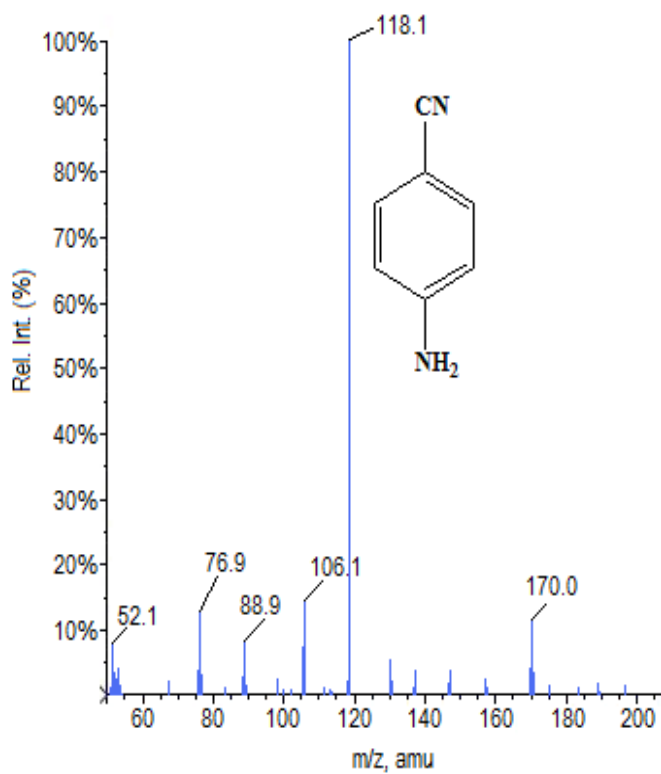

### 10. methyl cinnamate to methyl 3-phenylpropanoate

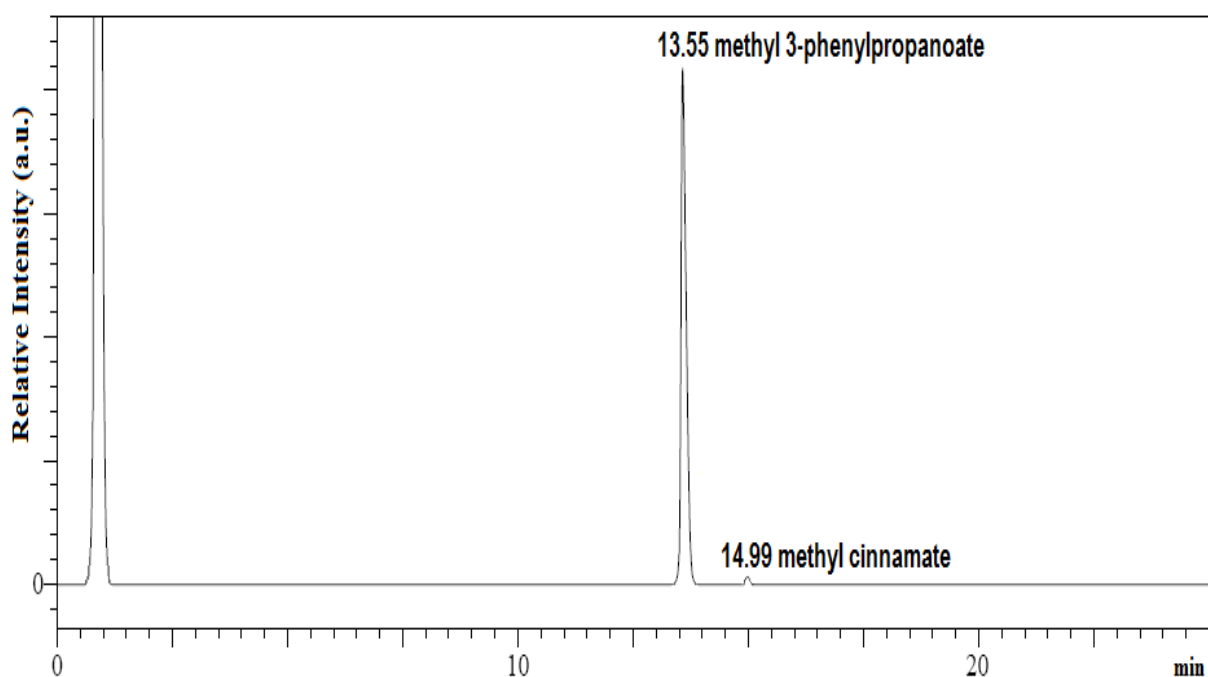

Peak Table – Channel 1

| Peak# | Ret. Time | Name                      | Area    | Area%  |
|-------|-----------|---------------------------|---------|--------|
| 1     | 13.55     | methyl 3-phenylpropanoate | 5383647 | 99.27  |
| 2     | 14.99     | methyl cinnamate          | 39590   | 0.73   |
| Total |           |                           |         | 100.00 |

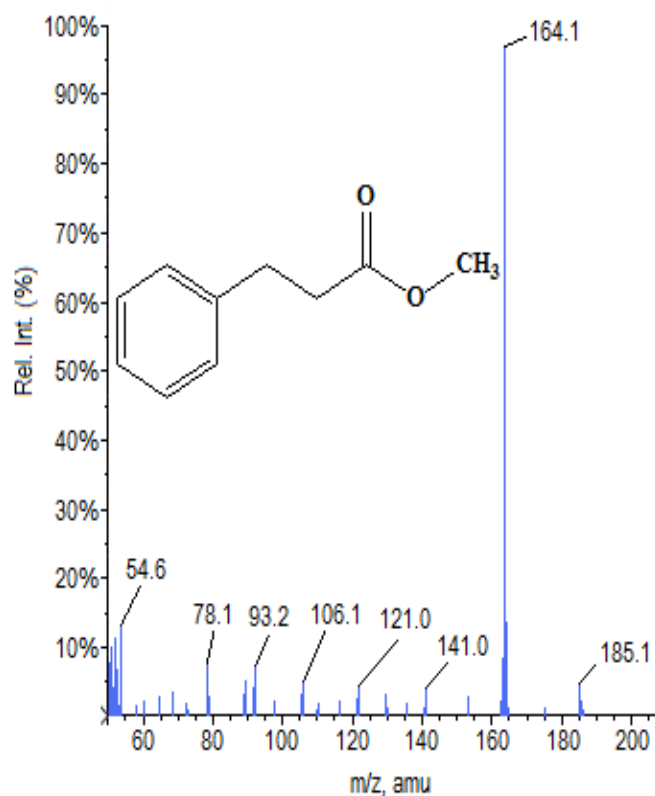

**Table T1:** Hydrogenation of nitrobenzene using nickel nanoparticles and nZVI with NaBH<sub>4</sub> at ambient conditions.

| Catalyst | Substrate                                                                         | Product                                                                           | Time | Yield (%) |
|----------|-----------------------------------------------------------------------------------|-----------------------------------------------------------------------------------|------|-----------|
| Ni NP's  | 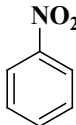 |  | 1 h  | NR        |
| Fe NP's  |  |  | 4 h  | 49.86     |

\*NR – no reaction
